# Supplementary material for: The Synthesis, In Vitro Bio-Evaluation, and In Silico Molecular Docking Studies of Pyrazoline–Thiazole Hybrid Analogues as Promising Anti-α-Glucosidase and Anti-Urease Agents
Source: MDPI journal article supplement (doi:10.3390/ph16121650), 2023-11-25
Supplement: s1 [file s1]

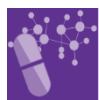

## Article

# The Synthesis, In Vitro Bio-Evaluation, and In Silico Molecular Docking Studies of Pyrazoline–Thiazole Hybrid Analogues as Promising Anti- $\alpha$ -Glucosidase and Anti-Urease Agents

Yousaf Khan <sup>1</sup>, Shoaib Khan <sup>2</sup>, Rafaqat Hussain <sup>3,\*</sup>, Aneela Maalik <sup>1,\*</sup>, Wajid Rehman <sup>3</sup>,  
Mohamed W. Attwa <sup>4</sup>, Rafia Masood <sup>1</sup>, HanyW. Darwish <sup>4</sup> and Hazem A. Ghabbour <sup>5</sup>

<sup>1</sup> Department of Chemistry, COMSATS University Islamabad Campus, Islamabad 45550, Pakistan;

yousaf7n@gmail.com (Y.K.); rafia12@yahoo.com (R.M.)

<sup>2</sup> Department of Chemistry, Abbottabad University of Science and Technology (AUST),  
Abbottabad 22500, Pakistan; shoaibkhanswati@gmail.com

<sup>3</sup> Department of Chemistry, Hazara University, Mansehra 21120, Pakistan; sonowaj@yahoo.com

<sup>4</sup> Department of Pharmaceutical Chemistry, College of Pharmacy, King Saud University,  
Riyadh 11451, Saudi Arabia; mzeidan@ksu.edu.sa (M.W.A.); hdarwish@ksu.edu.sa (H.W.D.)

<sup>5</sup> School of Health and Biomedical Sciences, RMIT University, Melbourne 3083, Australia;

hazem.ghabbour@rmit.edu.au

\* Correspondence: rafaqathussain0347@gmail.com (R.H.); aneela.maalik@comsats.edu.pk (A.M.)

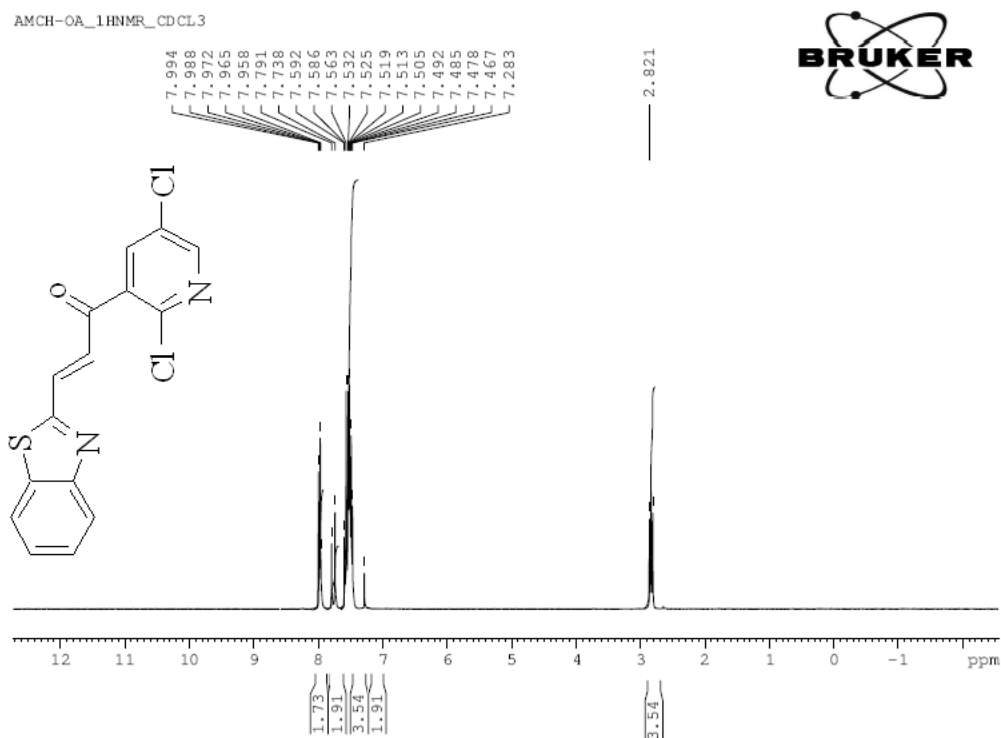

Figure

**S1.** <sup>1</sup>HNMR for the compound **Chalcone** (E)-3-(benzo[d]thiazol-2-yl)-1-(2,5-dichloropyridin-3-yl)prop-2-en-1-one

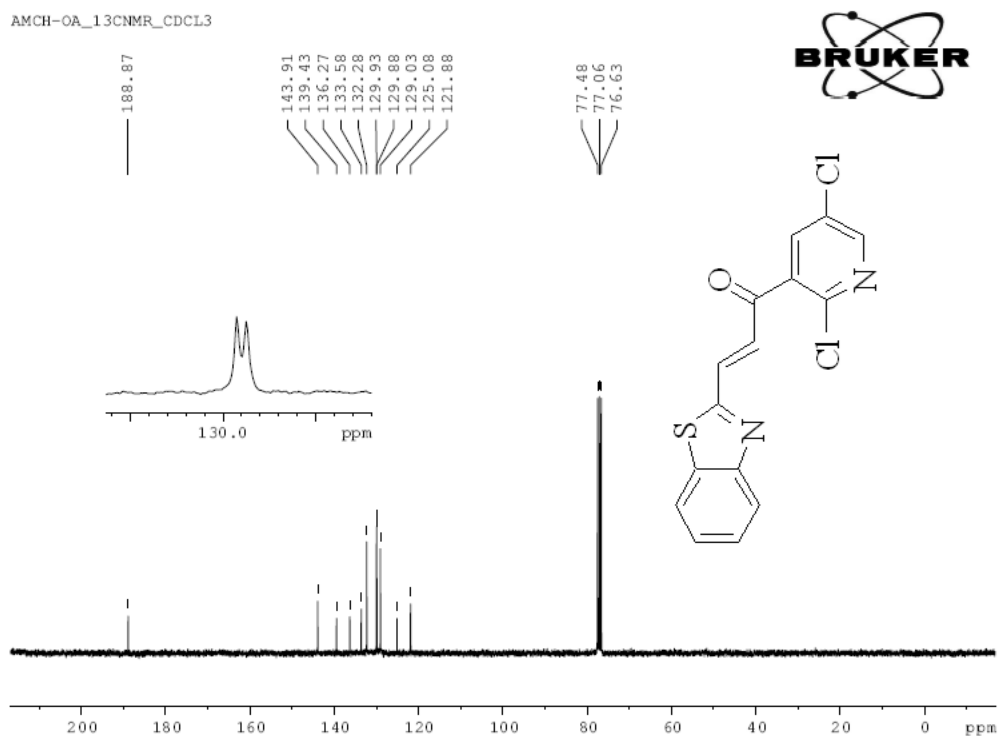

**Figure S2.** <sup>13</sup>CNMR Spectra for the compound **Chalcone** (E)-3-(benzo[d]thiazol-2-yl)-1-(2,5-dichloropyridin-3-yl)prop-2-en-1-one

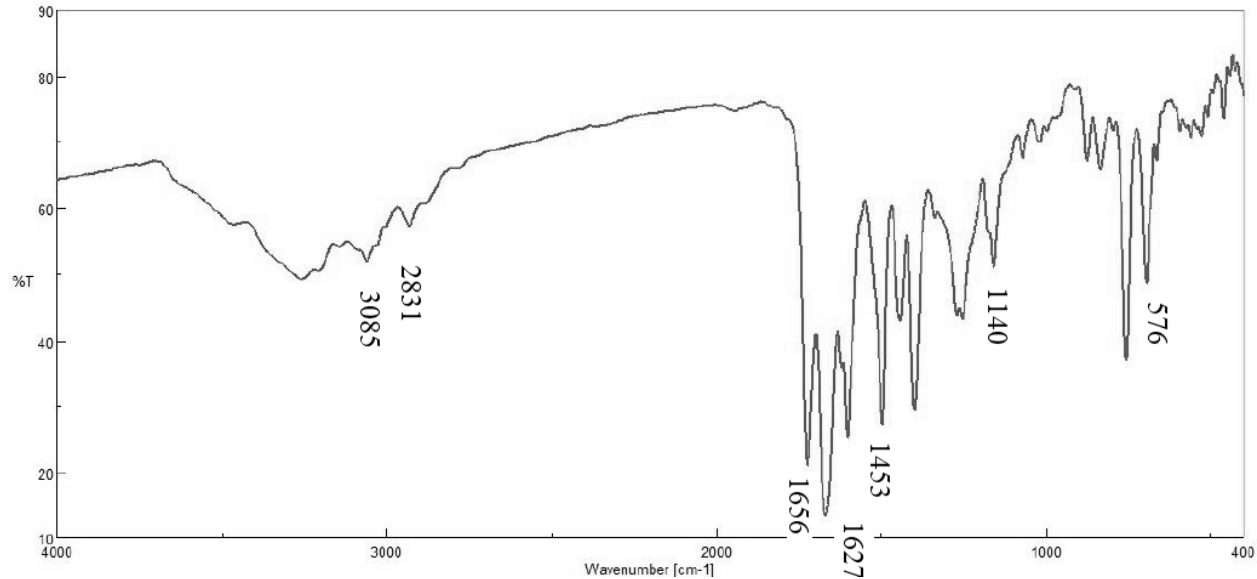

**Figure S3.** FTIR spectra for the compound **2(R)-2-(3-(2,5-dichloropyridin-3-yl)-1-(4-(2,5-dimethylphenyl)thiazol-2-yl)-4,5-dihydro-1H-pyrazol-5-yl)benzo[d]thiazole**



4A\_13CNMR\_CDCL3

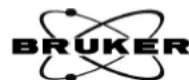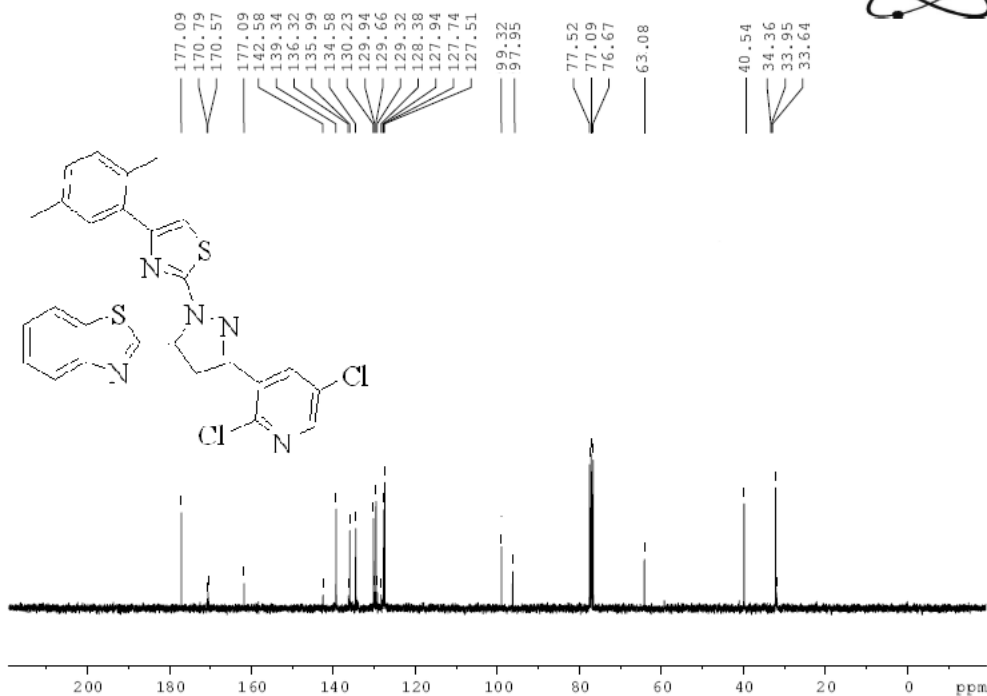

**Figure S5.** <sup>13</sup>CNMR for the compound **2** (*R*)-2-(3-(2,5-dichloropyridin-3-yl)-1-(4-(2,5-dimethylphenyl)thiazol-2-yl)-4,5-dihydro-1H-pyrazol-5-yl)benzo[d]thiazole

5B\_1HNMR\_CDCL3

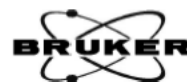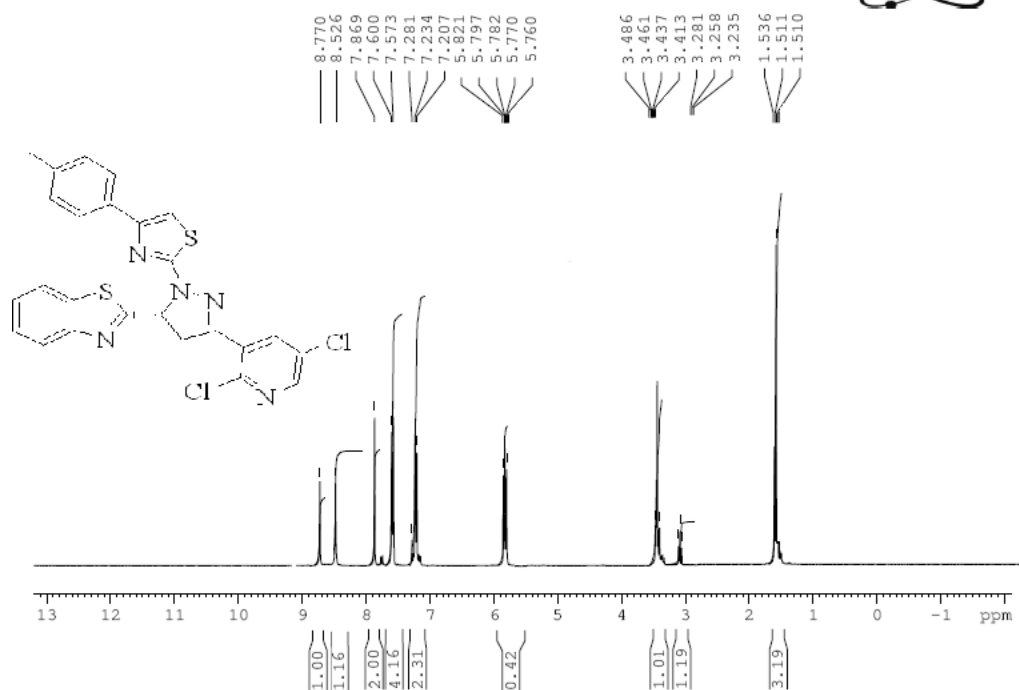

**Figure S6.** <sup>1</sup>HNMR for the compound **3** (*R*)-2-(3-(2,5-dichloropyridin-3-yl)-1-(4-(*p*-tolyl)thiazol-2-yl)-4,5-dihydro-1H-pyrazol-5-yl)benzo[d]thiazole

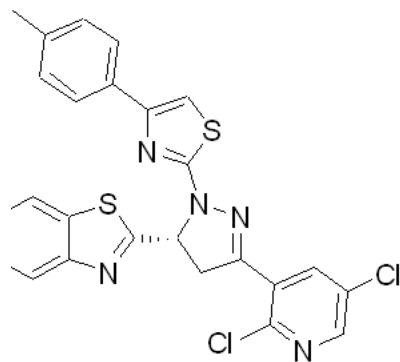

IR spectrum showing %T (Y-axis, 20 to 80) versus Wavenumber [cm<sup>-1</sup>] (X-axis, 4000 to 400). The spectrum displays characteristic absorption bands for polyacetylene, including a broad peak around 3300 cm<sup>-1</sup>, a sharp peak at 1632 cm<sup>-1</sup>, and several peaks in the fingerprint region below 1500 cm<sup>-1</sup>. Labeled peaks include 3286, 3064, 2873, 1687, 1632, 1077, and 598 cm<sup>-1</sup>.

**Figure S8**, FTIR spectra for the compound **7(R)**-2-(2-(5-(benzo[d]thiazol-2-yl)-3-(2,5-dichloropyridin-3-yl)-4,5-dihydro-1H-pyrazol-1-yl)thiazol-4-yl)-5-fluorophenol

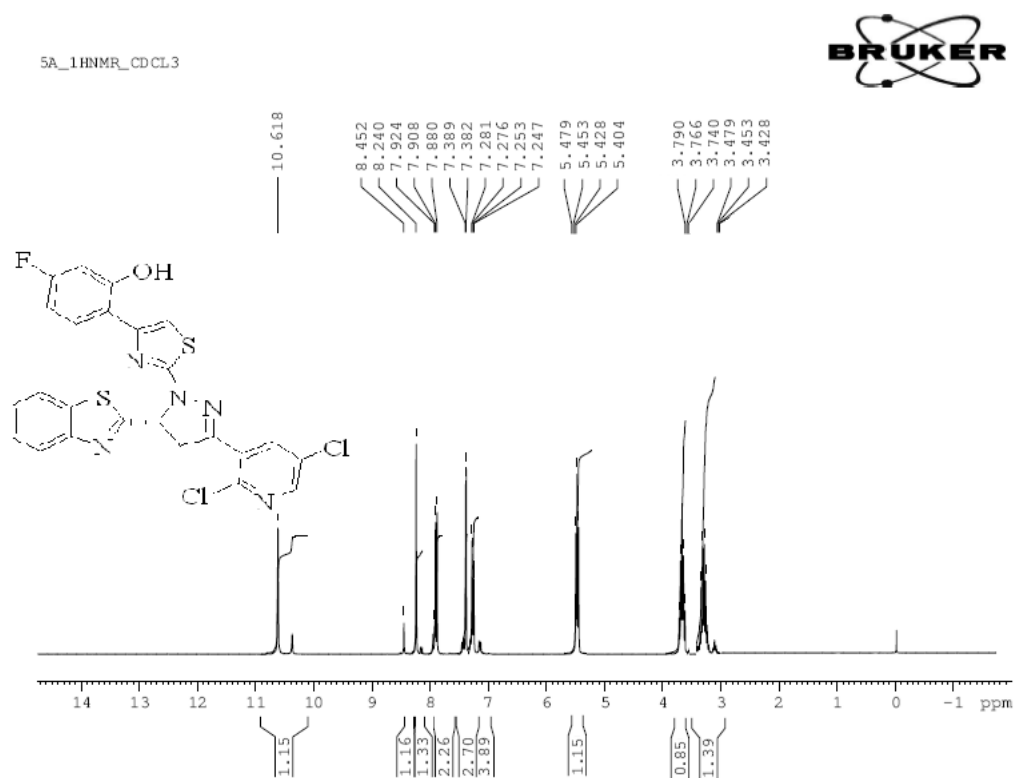

**Figure S9.**  $^1\text{H}$ NMR for the compound **7** (R)-2-(2-(5-(benzo[d]thiazol-2-yl)-3-(2,5-dichloropyridin-3-yl)-4,5-dihydro-1H-pyrazol-1-yl)thiazol-4-yl)-5-fluorophenol

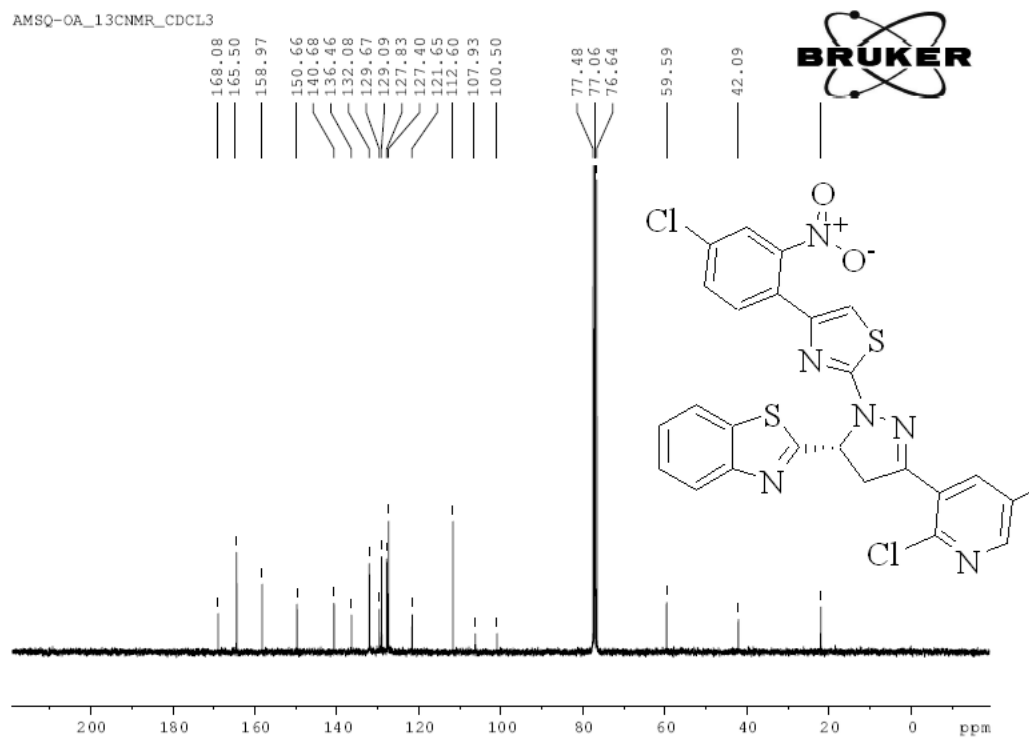

**Figure S10.**  $^{13}\text{C}$ NMR for the compound **9** (*R*)-2-(1-(4-(4-chloro-2-nitrophenyl)thiazol-2-yl)-3-(2,5-dichloropyridin-3-yl)-4,5-dihydro-1H-pyrazol-5-yl)benzo[d]thiazole

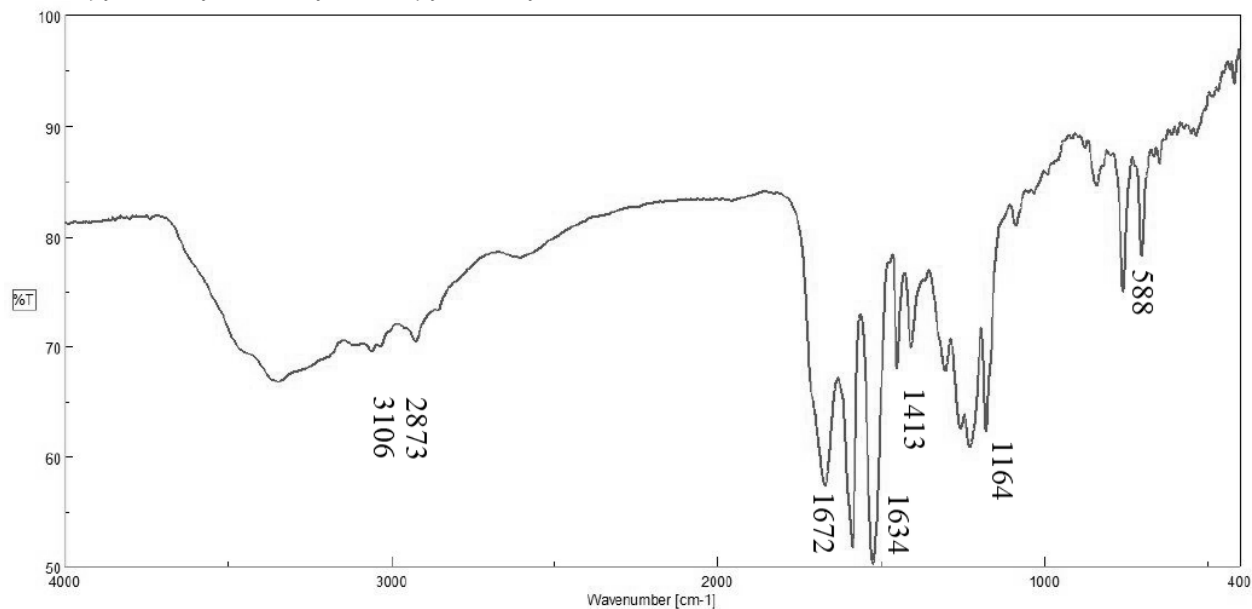

**Figure S11.** FTIR spectra for the compound **11** (*R*)-2-(3-(2,5-dichloropyridin-3-yl)-1-(4-(2-fluorophenyl)thiazol-2-yl)-4,5-dihydro-1H-pyrazol-5-yl)benzo[d]thiazole

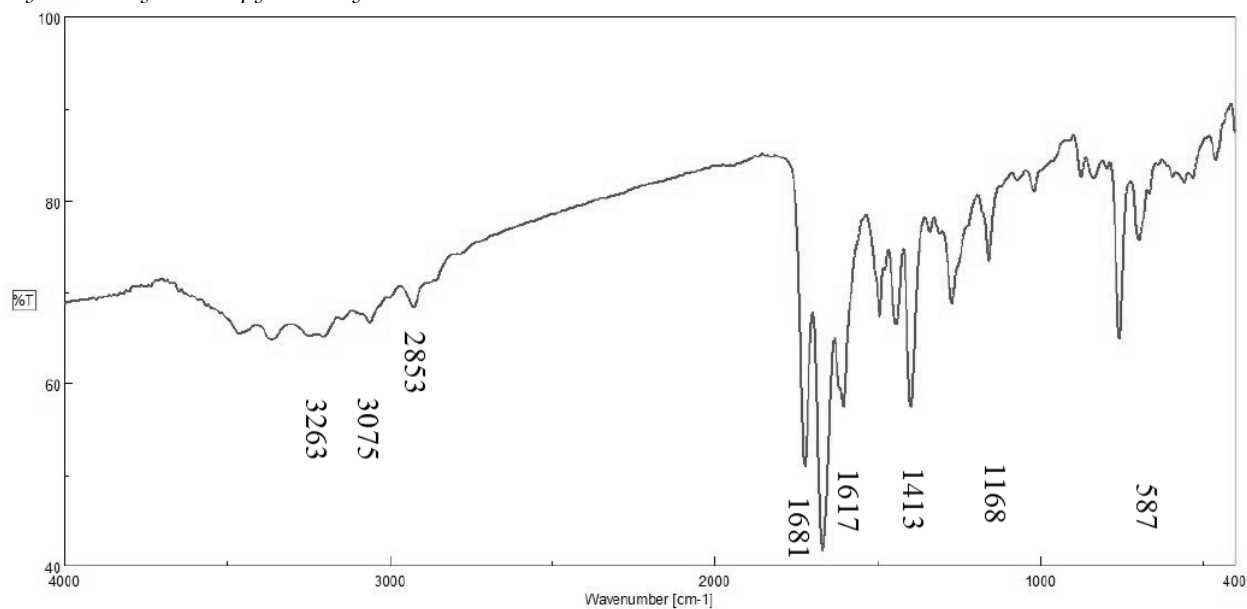

**Figure S12.** FTIR spectra for the compound **14** (*R*)-2-(2-(5-(benzo[d]thiazol-2-yl)-3-(2,5-dichloropyridin-3-yl)-4,5-dihydro-1H-pyrazol-1-yl)thiazol-4-yl)-3,5-dichlorophenol
